# Supplementary material for: RBL2/DREAM-mediated repression of the Aurora kinase A/B pathway determines therapy responsiveness and outcome in p53 WT NSCLC
Source: PubMed Central journal article supplement (PMC8776870; doi:10.1038/s41598-022-05013-4), 2022-01-20
Supplement: 41598_2022_5013_MOESM1_ESM.pdf [file 41598_2022_5013_MOESM1_ESM.pdf]

## Supplemental data

### Figure legend

**Figure S1. Figure 1. p53 direct target genes do not correlate with prognosis in NSCLC.** 994 patients were tested for association of p53 status or gene expression levels with survival by Kaplan-Meier curve. Patients with  $\geq$ median gene expression levels are taken as high expression (~50% of patients) and  $<$ median are taken as low expression. High expression of *MDM2*, *CDKN1A*, or *BBC3* does not significantly (p values shown) associate with survival of the patients.

**Figure S2.** A. Three individual replicate of the graphs in Fig. 5B. B. Three individual replicate of the graphs in Fig. 5C. C. Representative images of colonies for the graphs in Fig. 5B. D. Representative images of colonies for the graphs in Fig. 5C.

**Figure S3.** A. Three individual replicate of the graphs in Fig. 6A. B. Three individual replicate of the graphs in Fig. 6B. C. Representative images of colonies for the graphs in Fig. 6A. D. Representative images of colonies for the graphs in Fig. 6B.

**Figure S4.** A and C. Three individual replicate of the graphs in Fig. 6E. B and D. Representative images of colonies for the graphs in Fig. 6E. E and G. Three individual replicate of the graphs in Fig. 6F. F and H. Representative images of colonies for the graphs in Fig. 6F.

**Figure S5.** Immunoblot images in Fig 6B and 6E.

**Figure S6.** A and C. Three individual replicate of the graphs in Fig. 6H. B and D. Representative images of colonies for the graphs in Fig. 6H.

Figure S1

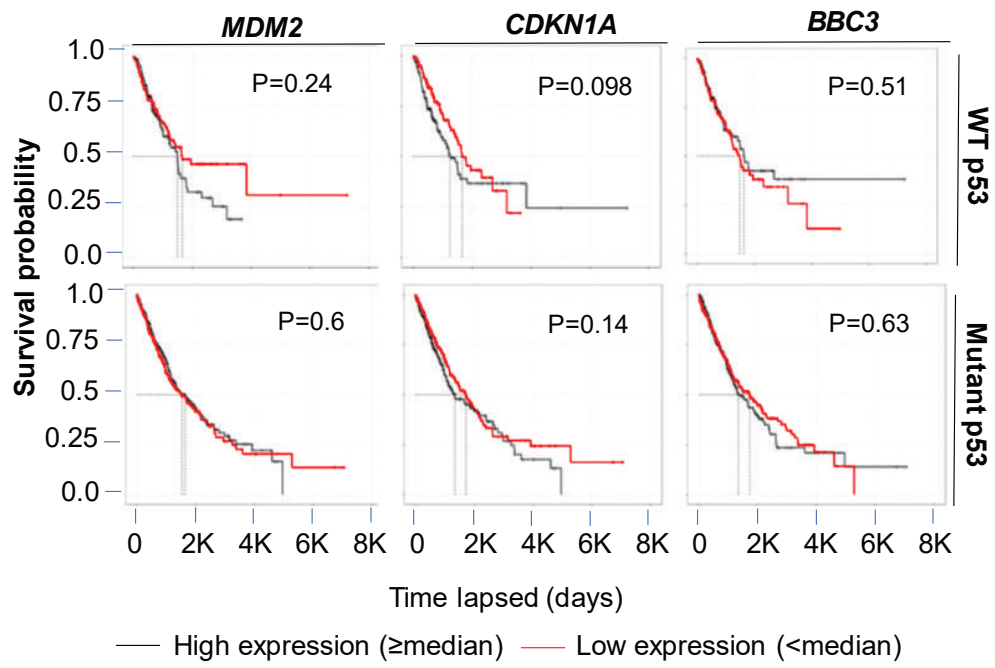

Figure S2

A.

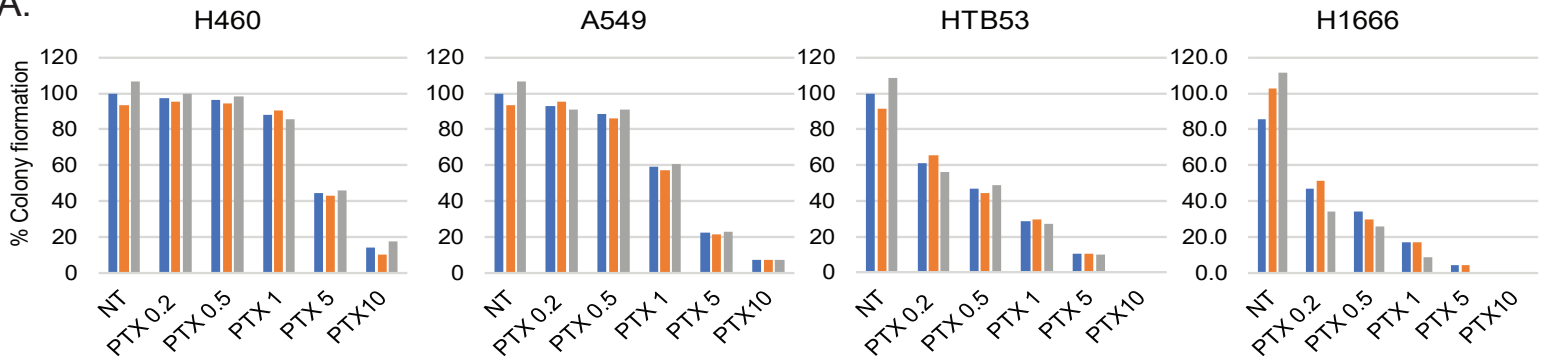

B.

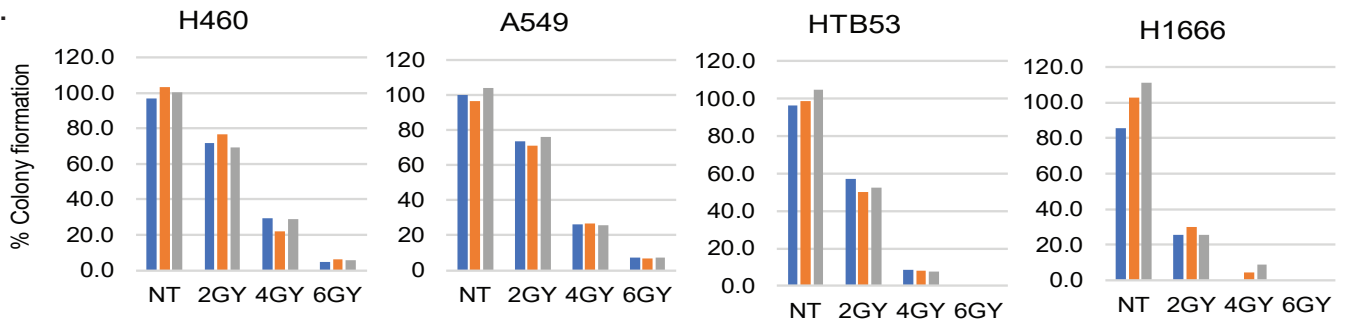

C.

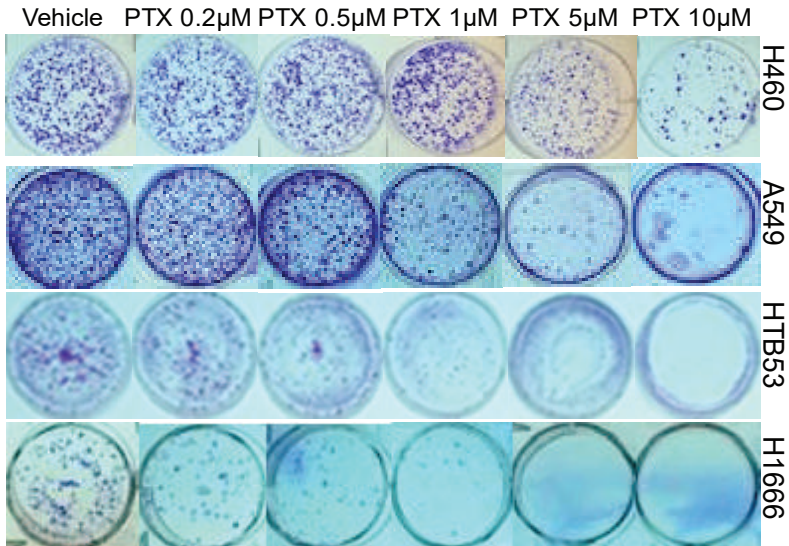

D.

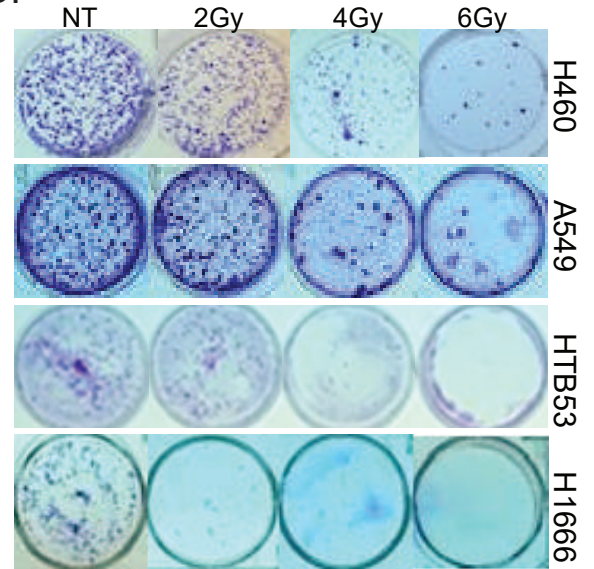

Figure S3

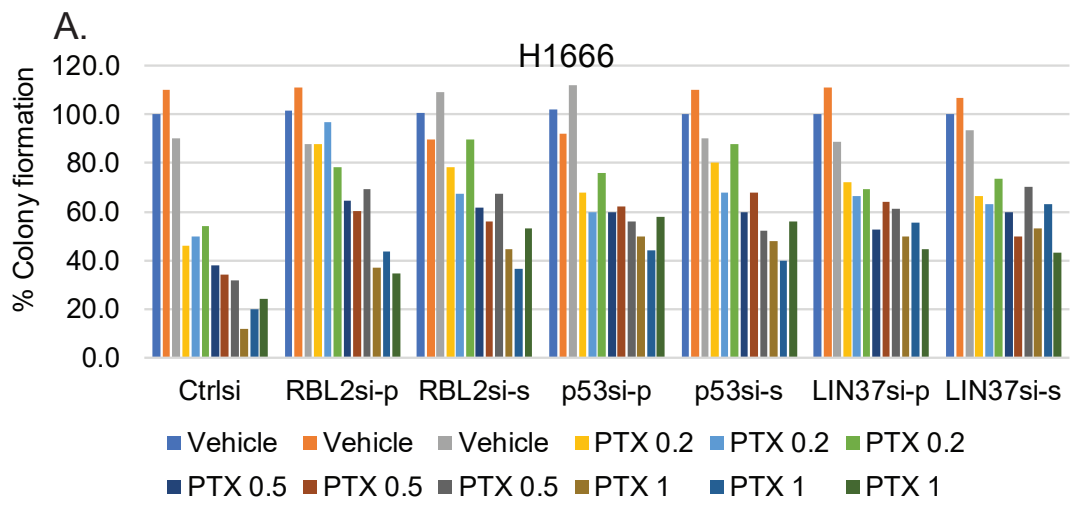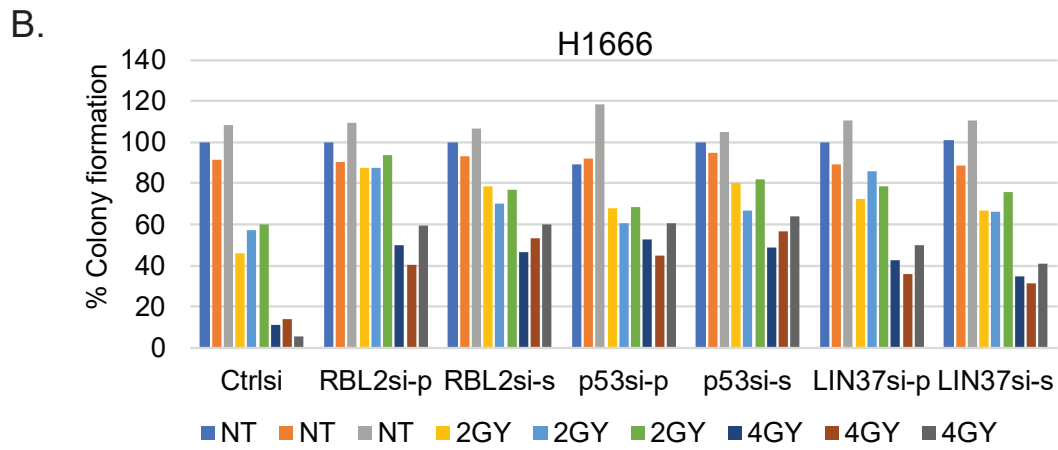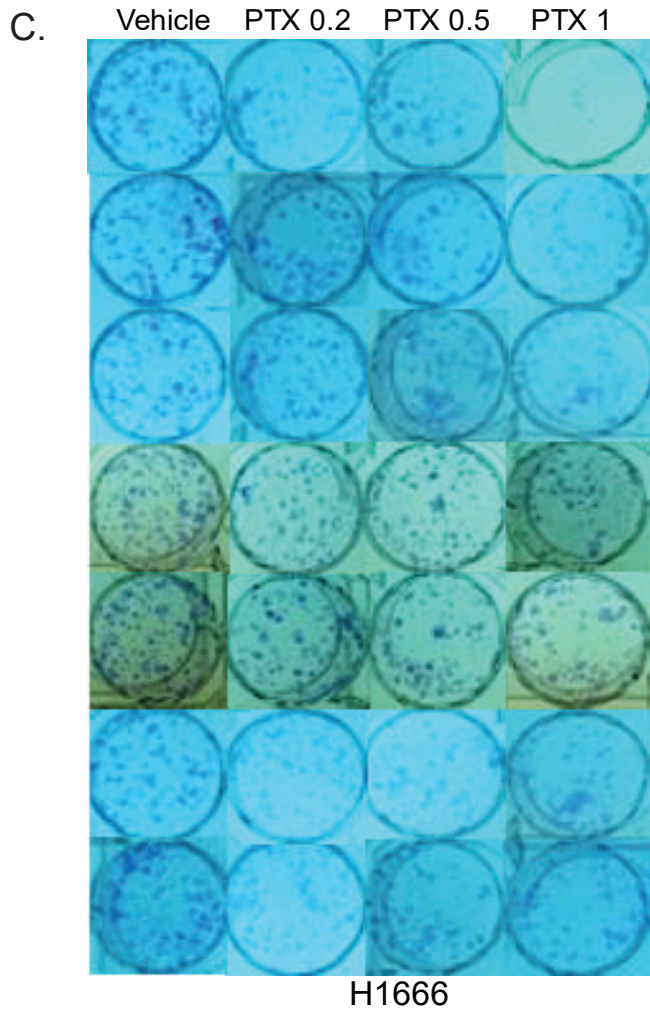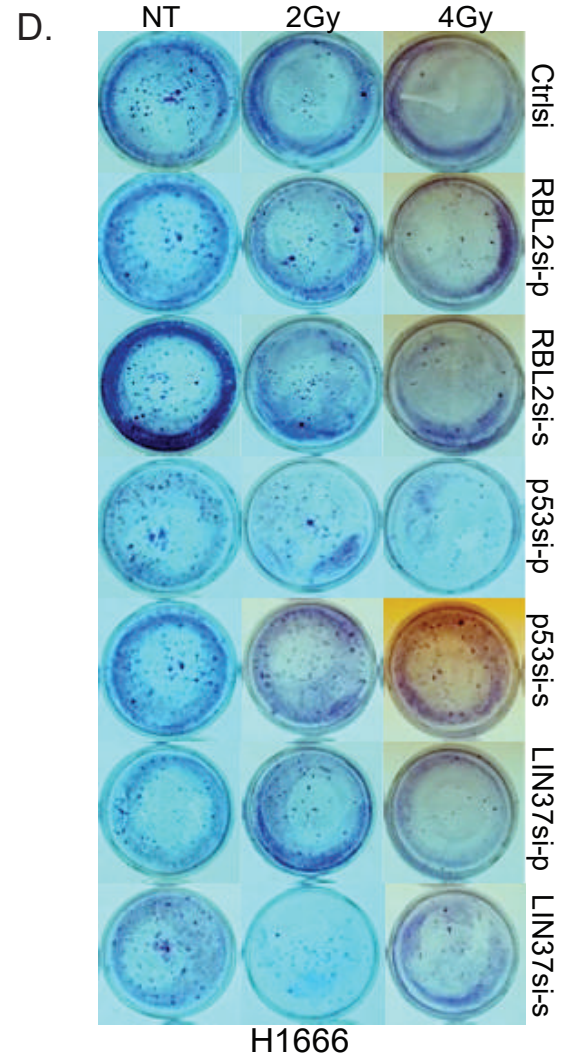

Figure S4

A.

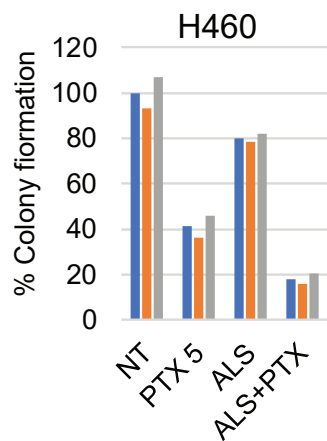

B.

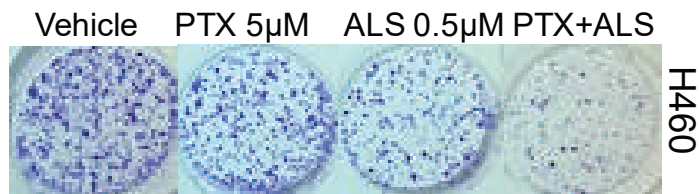

C.

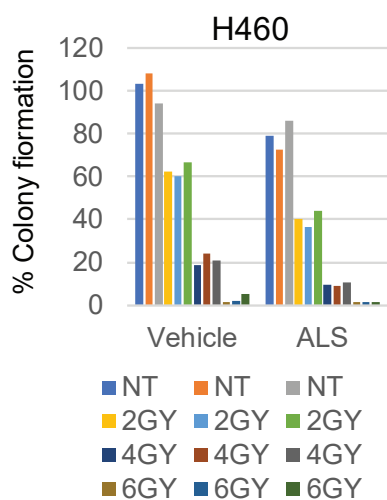

D.

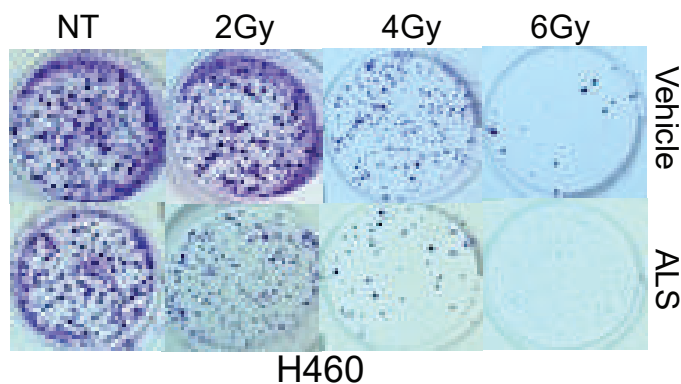

E.

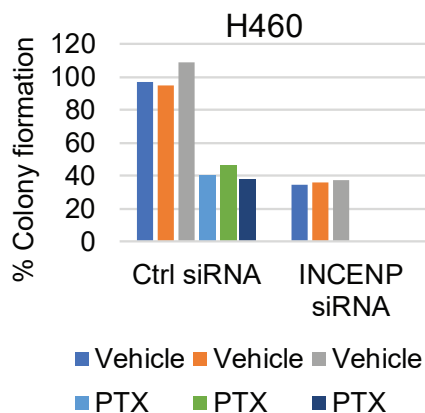

F.

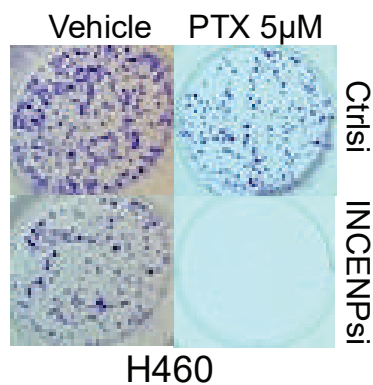

G.

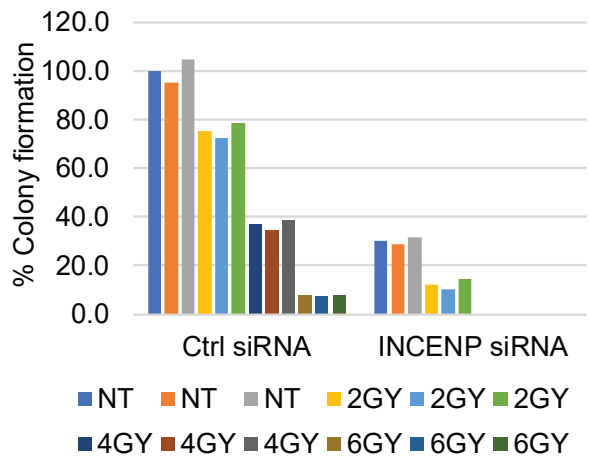

H.

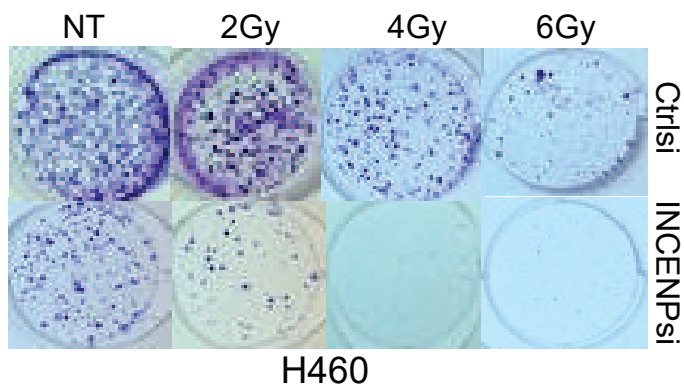

Figure S5

Original filrs for Flgure 5D

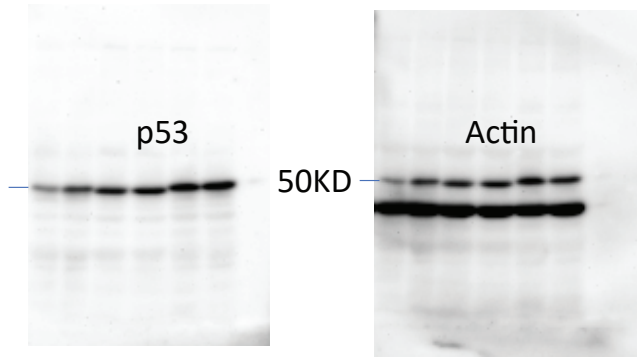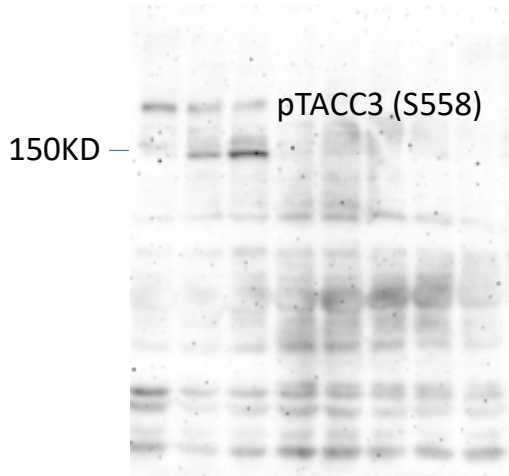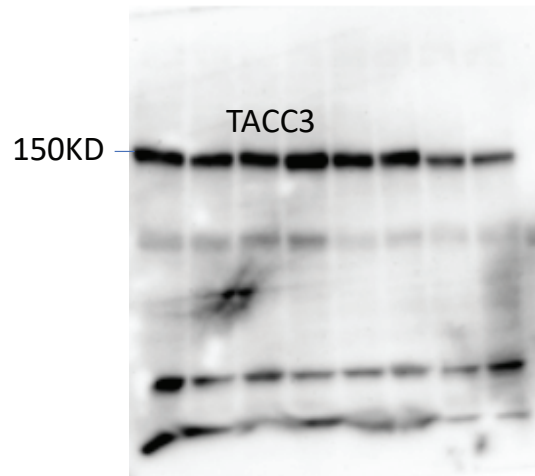

Orinial filrs for Figure 5G

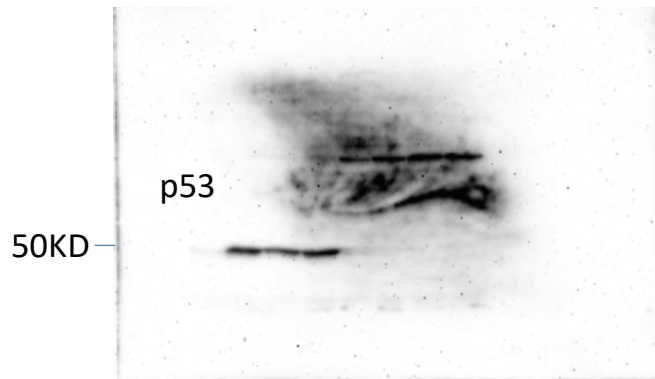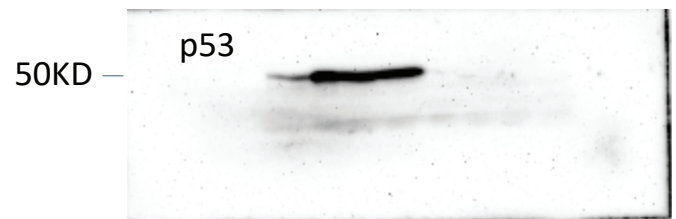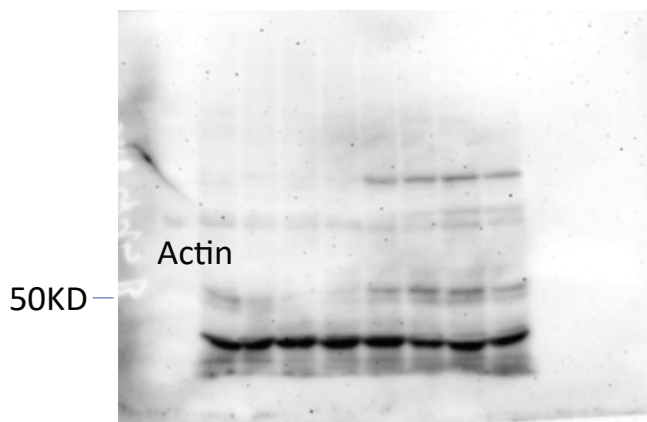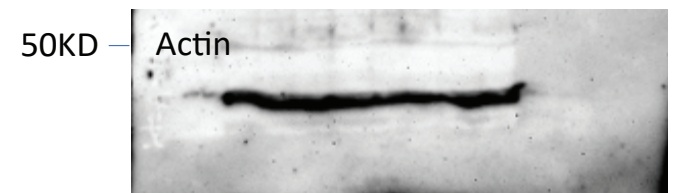



Figure S6

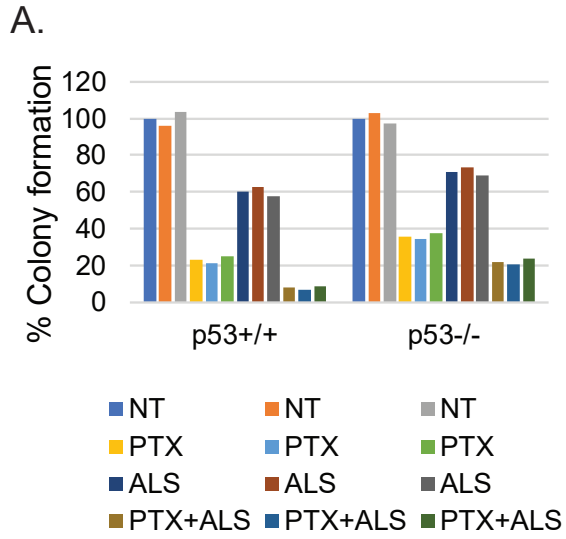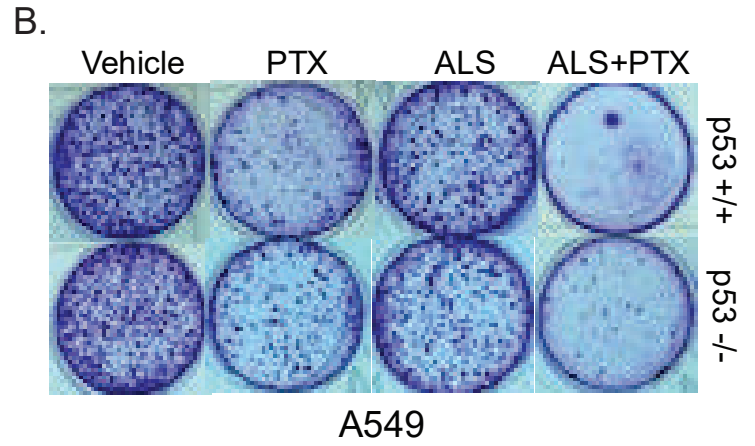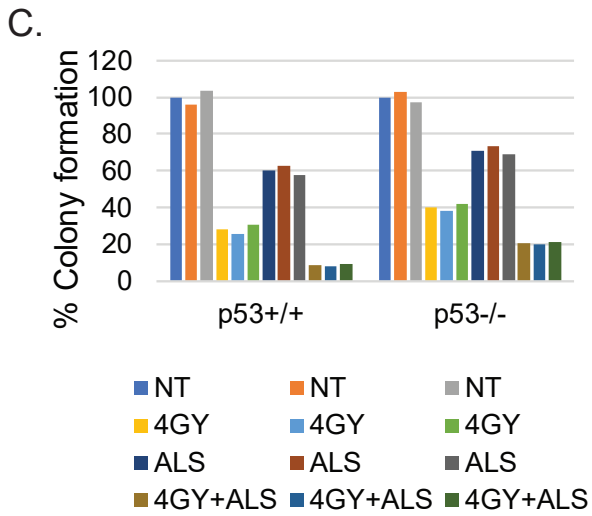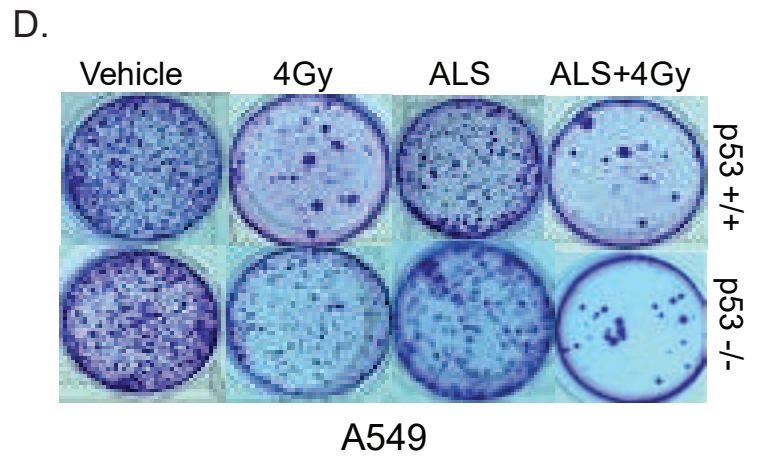

**Table S1 : Genes negatively correlated with RBL2 in WT p53 tumors**

|                  | WT p53 NSCLC      | Mut p53 NSCLC     |  |                 | WT p53 NSCLC      | Mut p53 NSCLC     |
|------------------|-------------------|-------------------|--|-----------------|-------------------|-------------------|
| Gene Names       | Pearson with RBL2 | Pearson with RBL2 |  | Gene Names      | Pearson with RBL2 | Pearson with RBL2 |
| <b>MKI67</b>     | -0.20             | -0.04             |  | <b>CENPU</b>    | -0.28             | -0.15             |
| <b>CENPE</b>     | -0.22             | -0.05             |  | <b>DEPDC1</b>   | -0.26             | -0.15             |
| <b>C5orf34</b>   | -0.22             | -0.05             |  | <b>EXO1</b>     | -0.24             | -0.15             |
| <b>CENPI</b>     | -0.2              | -0.06             |  | <b>FOXM1</b>    | -0.23             | -0.15             |
| <b>CENPN</b>     | -0.22             | -0.07             |  | <b>SPAG5</b>    | -0.26             | -0.16             |
| <b>INCENP</b>    | -0.20             | -0.07             |  | <b>CDC45</b>    | -0.27             | -0.16             |
| <b>FAM72A</b>    | -0.23             | -0.08             |  | <b>CEP55</b>    | -0.28             | -0.16             |
| <b>IQGAP3</b>    | -0.28             | -0.08             |  | <b>MND1</b>     | -0.24             | -0.16             |
| <b>KIF14</b>     | -0.21             | -0.08             |  | <b>RAD51AP1</b> | -0.2              | -0.16             |
| <b>PLK4</b>      | -0.21             | -0.08             |  | <b>CENPL</b>    | -0.24             | -0.17             |
| <b>CENPF</b>     | -0.21             | -0.09             |  | <b>CENPH</b>    | -0.24             | -0.17             |
| <b>CDC48</b>     | -0.27             | -0.1              |  | <b>GGH</b>      | -0.25             | -0.17             |
| <b>KIF11</b>     | -0.23             | -0.11             |  | <b>MCM4</b>     | -0.2              | -0.17             |
| <b>ARHGGEF39</b> | -0.23             | -0.11             |  | <b>PRR11</b>    | -0.27             | -0.17             |
| <b>FAM72B</b>    | -0.26             | -0.11             |  | <b>UNG</b>      | -0.2              | -0.17             |
| <b>ARHGA11A</b>  | -0.2              | -0.12             |  | <b>CDCA2</b>    | -0.22             | -0.18             |
| <b>DIAPH3</b>    | -0.22             | -0.12             |  | <b>CDT1</b>     | -0.24             | -0.18             |
| <b>HMMR</b>      | -0.25             | -0.12             |  | <b>CHEK1</b>    | -0.24             | -0.18             |
| <b>NEIL3</b>     | -0.23             | -0.12             |  | <b>FAM72D</b>   | -0.31             | -0.18             |
| <b>STIL</b>      | -0.2              | -0.12             |  | <b>GTSE1</b>    | -0.27             | -0.18             |
| <b>ANLN</b>      | -0.27             | -0.13             |  | <b>MELK</b>     | -0.23             | -0.18             |
| <b>ESCO2</b>     | -0.2              | -0.14             |  | <b>PARPBP</b>   | -0.22             | -0.18             |
| <b>ESPL1</b>     | -0.25             | -0.14             |  | <b>TTK</b>      | -0.24             | -0.18             |
| <b>CIP2A</b>     | -0.2              | -0.14             |  | <b>ZNF714</b>   | -0.23             | -0.18             |
| <b>KIF15</b>     | -0.2              | -0.14             |  | <b>BUB1B</b>    | -0.24             | -0.19             |
| <b>RAD54B</b>    | -0.22             | -0.14             |  | <b>KIF4A</b>    | -0.28             | -0.19             |
| <b>RAD54L</b>    | -0.23             | -0.14             |  | <b>CDC25C</b>   | -0.33             | -0.19             |
| <b>TONSL</b>     | -0.2              | -0.14             |  | <b>NUF2</b>     | -0.28             | -0.19             |
| <b>ERCC6L</b>    | -0.27             | -0.15             |  | <b>PRC1</b>     | -0.25             | -0.19             |



**Table S2 : Genes negatively correlated with RBL2 in WT p53 tumors and in mutant p53 tumors**

|            | WT p53 NSCLC      | Mut p53 NSCLC     |            | WT p53 NSCLC      | Mut p53 NSCLC     |            | WT p53 NSCLC      | Mut p53 NSCLC     |
|------------|-------------------|-------------------|------------|-------------------|-------------------|------------|-------------------|-------------------|
| Gene Names | Pearson with RBL2 | Pearson with RBL2 | Gene Names | Pearson with RBL2 | Pearson with RBL2 | Gene Names | Pearson with RBL2 | Pearson with RBL2 |
| KIF23      | -0.24             | -0.20             | KCNK5      | -0.31             | -0.22             | TROAP      | -0.31             | -0.25             |
| NUSAP1     | -0.23             | -0.20             | MIS18BP1   | -0.23             | -0.22             | CENPM      | -0.3              | -0.26             |
| GINS1      | -0.24             | -0.2              | ORC1       | -0.25             | -0.22             | CEP295     | -0.29             | -0.26             |
| KIF18B     | -0.24             | -0.2              | PBK        | -0.26             | -0.22             | DLGAP5     | -0.3              | -0.26             |
| MIS18A     | -0.24             | -0.2              | PKMYT1     | -0.32             | -0.22             | H2AFZ      | -0.33             | -0.26             |
| NCAPG      | -0.24             | -0.2              | PSRC1      | -0.26             | -0.22             | HIURP      | -0.29             | -0.26             |
| NDC80      | -0.3              | -0.2              | TRAIP      | -0.27             | -0.22             | KIF2C      | -0.33             | -0.26             |
| NEK2       | -0.26             | -0.2              | ZNF92      | -0.31             | -0.22             | OIP5       | -0.26             | -0.26             |
| SUV39H1    | -0.28             | -0.2              | ZWINT      | -0.29             | -0.22             | UBE2T      | -0.32             | -0.26             |
| TRIP13     | -0.26             | -0.2              | AUNIP      | -0.28             | -0.23             | SPC24      | -0.28             | -0.27             |
| NCAPH      | -0.23             | -0.21             | CDC25A     | -0.24             | -0.23             | AURKB      | -0.29             | -0.28             |
| PLK1       | -0.29             | -0.21             | CDK1       | -0.27             | -0.23             | CENPW      | -0.33             | -0.28             |
| SGOL1      | -0.28             | -0.21             | CIT        | -0.23             | -0.23             | FEN1       | -0.26             | -0.28             |
| TPX2       | -0.28             | -0.21             | KIF20A     | -0.31             | -0.23             | LSM5       | -0.31             | -0.28             |
| ASF1B      | -0.28             | -0.21             | KIFC1      | -0.27             | -0.23             | PPIH       | -0.24             | -0.28             |
| BUB1       | -0.21             | -0.21             | H2AFX      | -0.34             | -0.24             | TKI        | -0.32             | -0.28             |
| TEDC1      | -0.29             | -0.21             | MDA2L1     | -0.28             | -0.24             | CCNB2      | -0.3              | -0.29             |
| CCNA2      | -0.28             | -0.21             | SKA3       | -0.34             | -0.24             | CENPA      | -0.29             | -0.29             |
| E2F1       | -0.22             | -0.21             | CDCA5      | -0.27             | -0.25             | MYBL2      | -0.24             | -0.29             |
| LRR1       | -0.27             | -0.21             | DSCC1      | -0.21             | -0.25             | RNASEH2A   | -0.28             | -0.3              |
| MCM10      | -0.24             | -0.21             | KNSTRN     | -0.25             | -0.25             | SPC25      | -0.28             | -0.3              |
| RECQL4     | -0.26             | -0.21             | MTFR2      | -0.27             | -0.25             | UBE2C      | -0.34             | -0.3              |
| SGO1       | -0.28             | -0.21             | PIMREG     | -0.27             | -0.25             | BIRC5      | -0.32             | -0.31             |
| SKA1       | -0.28             | -0.21             | POC1A      | -0.36             | -0.25             | CDC20      | -0.38             | -0.33             |
| AURKA      | -0.24             | -0.22             | RAPGAP1    | -0.24             | -0.25             | CKS2       | -0.36             | -0.33             |
| TEDC2      | -0.33             | -0.22             | RAD51      | -0.29             | -0.25             | NUDT1      | -0.33             | -0.33             |
| CDCA3      | -0.27             | -0.22             | SLC25A10   | -0.38             | -0.25             | DTYMK      | -0.43             | -0.37             |
| DEPDC1B    | -0.24             | -0.22             |            |                   |                   |            |                   |                   |

Table S3. Expression levels of AURKA/B pathway genes in WT p53 vs. mutant p53 NSCLC

|               | <b>WT p53 NSCLC</b>   | <b>Mut p53 NSCLC</b>  |          |
|---------------|-----------------------|-----------------------|----------|
| Gene Names    | Median (FKPM) ± STDEV | Median (FKPM) ± STDEV | p Value  |
| <b>ANLN</b>   | 3.7 ± 5.7             | 11.2 ± 9.2            | 2.25E-33 |
| <b>AURKA</b>  | 5.3 ± 6.2             | 11 ± 8.1              | 1.84E-21 |
| <b>AURKB</b>  | 3.7 ± 6.9             | 10.5 ± 8.3            | 8.69E-29 |
| <b>BUB1B</b>  | 2.1 ± 3.3             | 6.3 ± 4.2             | 1.32E-36 |
| <b>CDC20</b>  | 9.8 ± 17              | 28.9 ± 20             | 6.08E-35 |
| <b>CENPE</b>  | 0.8 ± 1               | 1.9 ± 1.4             | 1.38E-32 |
| <b>CENPF</b>  | 2.5 ± 4               | 6.9 ± 5.6             | 1.57E-30 |
| <b>CENPL</b>  | 1.4 ± 1               | 2.5 ± 1.5             | 5.64E-29 |
| <b>CENPN</b>  | 2.2 ± 2.6             | 4.8 ± 3.4             | 4.56E-30 |
| <b>ERCC6L</b> | 0.7 ± 0.9             | 1.8 ± 1.6             | 3.05E-25 |
| <b>INCENP</b> | 4.2 ± 3.4             | 7.9 ± 4.5             | 3.05E-32 |
| <b>KIF11</b>  | 3.6 ± 4.7             | 8.8 ± 5.1             | 3.65E-35 |
| <b>KIF23</b>  | 1.7 ± 2.8             | 5.7 ± 3.4             | 2.41E-44 |
| <b>KIF4A</b>  | 2.5 ± 3.6             | 7.2 ± 4.2             | 1.46E-42 |
| <b>MKI67</b>  | 3.6 ± 5.8             | 8.7 ± 6.3             | 1.38E-23 |
| <b>NCAPH</b>  | 2.5 ± 3.9             | 8.1 ± 5.3             | 7.61E-43 |
| <b>NUSAP1</b> | 7.4 ± 9.2             | 17.5 ± 12             | 1.09E-33 |
| <b>PLK1</b>   | 3.7 ± 5.2             | 9.3 ± 5.7             | 2.59E-31 |
| <b>SPAG5</b>  | 3.6 ± 4.2             | 8.1 ± 5.9             | 1.83E-29 |
| <b>SGOL1</b>  | 0.7 ± 1               | 1.8 ± 1.1             | 1.57E-30 |
| <b>TACC3</b>  | 5.9 ± 5.3             | 9.7 ± 7.8             | 1.49E-14 |
| <b>TPX2</b>   | 9.2 ± 15.2            | 28.8 ± 23             | 2.28E-35 |

**Table S4. Positive correlation of AURKA with other genes in WT p53 vs. mutant p53 NSCLC**

|                   | <b>WT p53 NSCLC</b>       | <b>Mut p53 NSCLC</b>      |
|-------------------|---------------------------|---------------------------|
| <b>Gene Names</b> | <b>Pearson with AURKA</b> | <b>Pearson with AURKA</b> |
| <b>ANLN</b>       | 0.68                      | 0.35                      |
| <b>AURKB</b>      | 0.71                      | 0.49                      |
| <b>BUB1B</b>      | 0.73                      | 0.5                       |
| <b>CDC20</b>      | 0.74                      | 0.53                      |
| <b>CENPE</b>      | 0.71                      | 0.45                      |
| <b>CENPF</b>      | 0.67                      | 0.42                      |
| <b>CENPL</b>      | 0.62                      | 0.36                      |
| <b>CENPN</b>      | 0.63                      | 0.38                      |
| <b>ERCC6L</b>     | 0.75                      | 0.34                      |
| <b>INCENP</b>     | 0.67                      | 0.41                      |
| <b>KIF11</b>      | 0.69                      | 0.46                      |
| <b>KIF23</b>      | 0.73                      | 0.49                      |
| <b>KIF4A</b>      | 0.77                      | 0.56                      |
| <b>MKI67</b>      | 0.66                      | 0.38                      |
| <b>NCAPH</b>      | 0.76                      | 0.52                      |
| <b>NUSAP1</b>     | 0.72                      | 0.49                      |
| <b>PLK1</b>       | 0.73                      | 0.53                      |
| <b>SPAG5</b>      | 0.77                      | 0.56                      |
| <b>SGOL1</b>      | 0.78                      | 0.55                      |
| <b>TACC3</b>      | 0.61                      | 0.32                      |
| <b>TPX2</b>       | 0.76                      | 0.44                      |

| Table S5 | A          | B           | C           | t-test (A and B) | t-test (A and C) |
|----------|------------|-------------|-------------|------------------|------------------|
| H1666    | Ctrl siRNA | p53 siRNA-p | p53 siRNA-s | p values         | p values         |
| AURKA    | 1          | 1.90        | 1.65        | 0.001            | 0.004            |
| AURKB    | 1          | 1.98        | 1.68        | 0.002            | 0.002            |
| CENPE    | 1          | 2.17        | 1.54        | 0.001            | 0.019            |
| CENPF    | 1          | 1.71        | 1.78        | 0.002            | 0.006            |
| CENPN    | 1          | 1.99        | 1.65        | 0.002            | 0.004            |
| ERCC6L   | 1          | 2.09        | 1.79        | 0.001            | 0.003            |
| INCENP   | 1          | 1.95        | 1.66        | 0.001            | 0.012            |
| KIF4A    | 1          | 1.98        | 1.67        | 0.000            | 0.008            |
| KIF23    | 1          | 1.98        | 1.66        | 0.000            | 0.010            |
| MKI67    | 1          | 1.70        | 1.57        | 0.004            | 0.007            |
| NCAPH    | 1          | 1.88        | 1.61        | 0.006            | 0.009            |
| NUSAP1   | 1          | 2.20        | 1.87        | 0.002            | 0.002            |
| PLK1     | 1          | 2.17        | 1.73        | 0.005            | 0.001            |
| SGOL1    | 1          | 1.79        | 1.61        | 0.006            | 0.003            |
| SPAG5    | 1          | 1.94        | 1.64        | 0.007            | 0.009            |
| TACC3    | 1          | 1.63        | 1.42        | 0.005            | 0.049            |

| Table S6 | A          | B            | C            | t-test (A and B) | t-test (A and C) |
|----------|------------|--------------|--------------|------------------|------------------|
| H1666    | Ctrl siRNA | RBL2 siRNA-p | RBL2 siRNA-s | p values         | p values         |
| AURKA    | 1          | 1.80         | 1.72         | 0.001            | 0.001            |
| AURKB    | 1          | 1.51         | 1.37         | 0.003            | 0.004            |
| CENPE    | 1          | 1.87         | 1.70         | 0.001            | 0.005            |
| CENPF    | 1          | 1.48         | 1.31         | 0.007            | 0.004            |
| CENPN    | 1          | 1.39         | 1.37         | 0.014            | 0.012            |
| ERCC6L   | 1          | 1.69         | 1.56         | 0.003            | 0.006            |
| INCENP   | 1          | 1.61         | 1.42         | 0.004            | 0.007            |
| KIF4A    | 1          | 1.61         | 1.77         | 0.007            | 0.007            |
| KIF23    | 1          | 1.72         | 1.65         | 0.001            | 0.003            |
| MKI67    | 1          | 1.54         | 1.61         | 0.007            | 0.011            |
| NCAPH    | 1          | 1.53         | 1.42         | 0.017            | 0.006            |
| NUSAP1   | 1          | 1.49         | 1.82         | 0.038            | 0.012            |
| PLK1     | 1          | 1.51         | 1.89         | 0.004            | 0.010            |
| SGOL1    | 1          | 1.69         | 1.57         | 0.008            | 0.004            |
| SPAG5    | 1          | 1.74         | 1.69         | 0.011            | 0.004            |
| TACC3    | 1          | 1.43         | 1.31         | 0.011            | 0.071            |

| Table S7 | A          | B             | C             | t-test (A and B) | t-test (A and C) |
|----------|------------|---------------|---------------|------------------|------------------|
| H1666    | Ctrl siRNA | LIN37 siRNA-p | LIN37 siRNA-s | p values         | p values         |
| AURKA    | 1          | 1.61          | 1.43          | 0.003            | 0.010            |
| AURKB    | 1          | 1.87          | 1.63          | 0.001            | 0.008            |
| CENPE    | 1          | 1.77          | 1.48          | 0.006            | 0.008            |
| CENPF    | 1          | 1.45          | 1.78          | 0.014            | 0.002            |
| CENPN    | 1          | 1.59          | 1.65          | 0.007            | 0.002            |
| ERCC6L   | 1          | 1.88          | 1.66          | 0.001            | 0.009            |
| INCENP   | 1          | 1.58          | 1.35          | 0.014            | 0.024            |
| KIF4A    | 1          | 2.04          | 1.91          | 0.001            | 0.001            |
| KIF23    | 1          | 1.85          | 1.87          | 0.003            | 0.011            |
| MKI67    | 1          | 1.71          | 1.91          | 0.010            | 0.006            |
| NCAPH    | 1          | 2.19          | 2.12          | 0.001            | 0.002            |
| NUSAP1   | 1          | 2.11          | 1.87          | 0.002            | 0.004            |
| PLK1     | 1          | 1.99          | 1.73          | 0.004            | 0.007            |
| SGOL1    | 1          | 1.47          | 1.66          | 0.003            | 0.006            |
| SPAG5    | 1          | 1.84          | 1.62          | 0.007            | 0.005            |
| TACC3    | 1          | 1.61          | 1.36          | 0.012            | 0.025            |

| <b>Table S8</b> | <b>A</b>          | <b>B</b>            | <b>C</b>            | <b>t-test (A and B)</b> | <b>t-test (A and C)</b> |
|-----------------|-------------------|---------------------|---------------------|-------------------------|-------------------------|
| <b>H2030</b>    | <b>Ctrl siRNA</b> | <b>RBL2 siRNA-p</b> | <b>RBL2 siRNA-s</b> | <b>p values</b>         | <b>p values</b>         |
| AURKA           | 1                 | 1.40                | 1.24                | 0.050                   | 0.001                   |
| AURKB           | 1                 | 0.69                | 0.53                | 0.058                   | 0.004                   |
| CENPE           | 1                 | 0.87                | 0.78                | 0.335                   | 0.005                   |
| CENPF           | 1                 | 0.59                | 0.76                | 0.027                   | 0.004                   |
| CENPN           | 1                 | 0.71                | 0.64                | 0.001                   | 0.012                   |
| ERCC6L          | 1                 | 0.75                | 0.67                | 0.293                   | 0.006                   |
| INCENP          | 1                 | 0.61                | 0.51                | 0.000                   | 0.007                   |
| KIF4A           | 1                 | 0.57                | 0.53                | 0.014                   | 0.007                   |
| KIF23           | 1                 | 0.54                | 0.55                | 0.057                   | 0.003                   |
| MKI67           | 1                 | 0.95                | 0.66                | 0.562                   | 0.011                   |
| NCAPH           | 1                 | 1.56                | 1.27                | 0.006                   | 0.006                   |
| NUSAP1          | 1                 | 1.53                | 1.09                | 0.115                   | 0.012                   |
| PLK1            | 1                 | 1.66                | 1.30                | 0.001                   | 0.010                   |
| SGOL1           | 1                 | 1.45                | 1.33                | 0.007                   | 0.004                   |
| SPAG5           | 1                 | 1.27                | 1.15                | 0.185                   | 0.004                   |
| TACC3           | 1                 | 1.04                | 0.98                | 0.659                   | 0.712                   |

| <b>Table S9</b> | <b>A</b>          | <b>B</b>             | <b>C</b>             | <b>t-test (A and B)</b> | <b>t-test (A and C)</b> |
|-----------------|-------------------|----------------------|----------------------|-------------------------|-------------------------|
| <b>H2030</b>    | <b>Ctrl siRNA</b> | <b>LIN37 siRNA-p</b> | <b>LIN37 siRNA-s</b> | <b>p values</b>         | <b>p values</b>         |
| AURKA           | 1                 | 1.13                 | 1.29                 | 0.061                   | 0.035                   |
| AURKB           | 1                 | 1.27                 | 0.85                 | 0.000                   | 0.089                   |
| CENPE           | 1                 | 0.38                 | 0.66                 | 0.002                   | 0.002                   |
| CENPF           | 1                 | 1.03                 | 1.26                 | 0.790                   | 0.054                   |
| CENPN           | 1                 | 0.54                 | 0.85                 | 0.001                   | 0.028                   |
| ERCC6L          | 1                 | 1.50                 | 1.17                 | 0.091                   | 0.017                   |
| INCENP          | 1                 | 0.63                 | 0.94                 | 0.004                   | 0.313                   |
| KIF4A           | 1                 | 0.32                 | 0.53                 | 0.000                   | 0.001                   |
| KIF23           | 1                 | 0.24                 | 0.53                 | 0.000                   | 0.002                   |
| MKI67           | 1                 | 0.57                 | 0.78                 | 0.011                   | 0.014                   |
| NCAPH           | 1                 | 0.36                 | 0.55                 | 0.001                   | 0.001                   |
| NUSAP1          | 1                 | 0.31                 | 0.46                 | 0.000                   | 0.000                   |
| PLK1            | 1                 | 0.29                 | 0.55                 | 0.000                   | 0.001                   |
| SGOL1           | 1                 | 1.31                 | 1.39                 | 0.011                   | 0.026                   |
| SPAG5           | 1                 | 0.48                 | 0.85                 | 0.000                   | 0.042                   |
| TACC3           | 1                 | 0.83                 | 0.71                 | 0.181                   | 0.001                   |

| <b>Table S10</b> | <b>A</b>          | <b>B</b>           | <b>C</b>           | <b>t-test (A and B)</b> | <b>t-test (A and C)</b> |
|------------------|-------------------|--------------------|--------------------|-------------------------|-------------------------|
| <b>H460</b>      | <b>Ctrl siRNA</b> | <b>p53 siRNA-p</b> | <b>p53 siRNA-s</b> | <b>p values</b>         | <b>p values</b>         |
| AURKA            | 1                 | 1.58               | 1.34               | 0.003                   | 0.028                   |
| AURKB            | 1                 | 1.49               | 1.30               | 0.043                   | 0.012                   |
| CENPE            | 1                 | 1.69               | 1.34               | 0.007                   | 0.022                   |
| CENPF            | 1                 | 1.32               | 1.23               | 0.024                   | 0.038                   |
| CENPN            | 1                 | 1.45               | 1.30               | 0.011                   | 0.061                   |
| ERCC6L           | 1                 | 2.13               | 1.83               | 0.011                   | 0.001                   |
| INCENP           | 1                 | 1.43               | 1.22               | 0.021                   | 0.045                   |
| KIF4A            | 1                 | 1.57               | 1.47               | 0.003                   | 0.003                   |
| KIF23            | 1                 | 1.42               | 1.44               | 0.007                   | 0.024                   |
| MKI67            | 1                 | 1.00               | 1.03               | 0.965                   | 0.094                   |
| NCAPH            | 1                 | 1.37               | 1.33               | 0.005                   | 0.010                   |
| NUSAP1           | 1                 | 1.55               | 1.32               | 0.005                   | 0.041                   |
| PLK1             | 1                 | 1.49               | 1.32               | 0.003                   | 0.023                   |
| SGOL1            | 1                 | 1.55               | 1.54               | 0.012                   | 0.014                   |
| SPAG5            | 1                 | 1.55               | 1.40               | 0.007                   | 0.023                   |
| TACC3            | 1                 | 1.24               | 1.31               | 0.046                   | 0.016                   |

| <b>Table S11</b> | <b>A</b>          | <b>B</b>            | <b>C</b>            | <b>t-test (A and B)</b> | <b>t-test (A and C)</b> |
|------------------|-------------------|---------------------|---------------------|-------------------------|-------------------------|
| <b>H460</b>      | <b>Ctrl siRNA</b> | <b>RBL2 siRNA-p</b> | <b>RBL2 siRNA-s</b> | <b>p values</b>         | <b>p values</b>         |
| AURKA            | 1                 | 1.30                | 1.22                | 0.006                   | 0.011                   |
| AURKB            | 1                 | 1.11                | 1.20                | 0.060                   | 0.028                   |
| CENPE            | 1                 | 1.47                | 1.30                | 0.004                   | 0.026                   |
| CENPF            | 1                 | 1.11                | 1.18                | 0.060                   | 0.096                   |
| CENPN            | 1                 | 1.19                | 1.17                | 0.057                   | 0.051                   |
| ERCC6L           | 1                 | 1.45                | 1.32                | 0.008                   | 0.018                   |
| INCENP           | 1                 | 1.32                | 1.33                | 0.010                   | 0.005                   |
| KIF4A            | 1                 | 1.20                | 1.22                | 0.022                   | 0.024                   |
| KIF23            | 1                 | 1.12                | 1.13                | 0.029                   | 0.085                   |
| MKI67            | 1                 | 0.94                | 1.01                | 0.346                   | 0.856                   |
| NCAPH            | 1                 | 1.03                | 0.92                | 0.714                   | 0.137                   |
| NUSAP1           | 1                 | 1.34                | 1.25                | 0.020                   | 0.002                   |
| PLK1             | 1                 | 1.15                | 1.18                | 0.220                   | 0.068                   |
| SGOL1            | 1                 | 1.29                | 1.17                | 0.044                   | 0.039                   |
| SPAG5            | 1                 | 1.34                | 1.29                | 0.050                   | 0.021                   |
| TACC3            | 1                 | 1.13                | 1.19                | 0.105                   | 0.028                   |

| <b>Table S12</b> | <b>A</b>      | <b>B</b>      | <b>t-test (A and B)</b> |
|------------------|---------------|---------------|-------------------------|
| <b>A549</b>      | <b>p53+/+</b> | <b>p53-/-</b> | <b>p values</b>         |
| <b>AURKA</b>     | 1             | 1.49          | 0.041                   |
| <b>AURKB</b>     | 1             | 1.66          | 0.034                   |
| <b>CENPE</b>     | 1             | 2.17          | 0.012                   |
| <b>CENPF</b>     | 1             | 1.21          | 0.066                   |
| <b>CENPN</b>     | 1             | 1.33          | 0.024                   |
| <b>ERCC6L</b>    | 1             | 2.33          | 0.007                   |
| <b>INCENP</b>    | 1             | 1.35          | 0.123                   |
| <b>KIF4A</b>     | 1             | 1.76          | 0.007                   |
| <b>KIF23</b>     | 1             | 1.77          | 0.010                   |
| <b>MKI67</b>     | 1             | 1.43          | 0.067                   |
| <b>NCAPH</b>     | 1             | 1.50          | 0.024                   |
| <b>NUSAP1</b>    | 1             | 1.44          | 0.024                   |
| <b>PLK1</b>      | 1             | 1.76          | 0.007                   |
| <b>SGOL1</b>     | 1             | 1.41          | 0.007                   |
| <b>SPAG5</b>     | 1             | 1.53          | 0.009                   |
| <b>TACC3</b>     | 1             | 1.19          | 0.042                   |



| <b>Table S13</b>                    | <b>2GY</b>      | <b>4GY</b>      | <b>PTX 0.2</b>  | <b>PTX 0.5</b>  | <b>PTX 1</b>    |
|-------------------------------------|-----------------|-----------------|-----------------|-----------------|-----------------|
| <b>Fig. 6A and B</b>                | <b>p values</b> | <b>p Values</b> | <b>p Values</b> | <b>p Values</b> | <b>p Values</b> |
| <b>Ctrl siRNA and RBL2 siRNA-p</b>  | 0.032           | 0.038           | 0.031           | 0.014           | 0.050           |
| <b>Ctrl siRNA and RBL2 siRNA-s</b>  | 0.011           | 0.018           | 0.038           | 0.023           | 0.034           |
| <b>Ctrl siRNA and p53 siRNA-p</b>   | 0.053           | 0.027           | 0.046           | 0.005           | 0.017           |
| <b>Ctrl siRNA and p53 siRNA-s</b>   | 0.048           | 0.019           | 0.033           | 0.029           | 0.026           |
| <b>Ctrl siRNA and LIN37 siRNA-p</b> | 0.016           | 0.039           | 0.029           | 0.038           | 0.029           |
| <b>Ctrl siRNA and LIN37 siRNA-s</b> | 0.047           | 0.041           | 0.016           | 0.061           | 0.046           |

| <b>Table S14</b> | <b>t test</b>          | <b>p values</b> |
|------------------|------------------------|-----------------|
| Fig.5E           | <b>NT and PTX</b>      | 0.0005          |
| Fig.5E           | <b>NT and ALS</b>      | 0.0204          |
| Fig.5E           | <b>PTX and ALS+PTX</b> | 0.0033          |
| Fig.5E           | <b>ALS and ALS+PTX</b> | 0.0000          |
| Fig.5E           | <b>2GY and ALS+2GY</b> | 0.0005          |
| Fig.5E           | <b>4GY and ALS+4GY</b> | 0.0238          |
| Fig.5E           | <b>6GY and ALS+6GY</b> | 0.2923          |

|        | <b>Table S15</b>                   | <b>Vehicle</b> | <b>PTX</b>     | <b>2GY</b>     | <b>4GY</b>     | <b>6GY</b>     |
|--------|------------------------------------|----------------|----------------|----------------|----------------|----------------|
|        | <b>t test</b>                      | <b>p Value</b> | <b>p Value</b> | <b>p Value</b> | <b>p Value</b> | <b>p Value</b> |
| Fig.5F | <b>Ctrl siRNA and INCENP siRNA</b> | 0.003582       | 0.003557       | 7.45408E-05    | 0.001096       | 0.000493       |

| <b>Table S16</b> | <b>t test</b>                            | <b>p values</b> |
|------------------|------------------------------------------|-----------------|
| Fig. 5H          | <b>p53+/+ NT and PTX</b>                 | 0.000           |
| Fig. 5H          | <b>p53+/+ NT and ALS</b>                 | 0.008           |
| Fig. 5H          | <b>p53+/+ PTX and PTx+ALS</b>            | 0.002           |
| Fig. 5H          | <b>p53+/+ ALS and PTX+ALS</b>            | 0.001           |
| Fig. 5H          | <b>p53-/- NT and PTX</b>                 | 0.002           |
| Fig. 5H          | <b>p53-/- NT and ALS</b>                 | 0.000           |
| Fig. 5H          | <b>p53-/- PTX and PTx+ALS</b>            | 0.000           |
| Fig. 5H          | <b>p53-/- ALS and PTX+ALS</b>            | 0.002           |
| Fig. 5H          | <b>p53+/+ PTX and p53-/- PTX</b>         | 0.001           |
| Fig. 5H          | <b>p53+/+ ALS and p53-/- ALS</b>         | 0.000           |
| Fig. 5H          | <b>p53+/+ PTX+ALS and p53-/- PTX+ALS</b> | 0.001           |
| Fig. 5H          | <b>p53+/+ NT and 4GY</b>                 | 8E-05           |
| Fig. 5H          | <b>p53+/+ 4GY and ALS+4GY</b>            | 0.003           |
| Fig. 5H          | <b>p53+/+ ALS and ALS+4GY</b>            | 0.001           |
| Fig. 5H          | <b>p53-/- NT and 4GY</b>                 | 0.002           |
| Fig. 5H          | <b>p53-/- 4GY and ALS+4GY</b>            | 0.001           |
| Fig. 5H          | <b>p53-/- ALS and ALS+ 4GY</b>           | 0.001           |
| Fig. 5H          | <b>p53+/+ 4GY and p53-/- 4GY</b>         | 0.001           |
| Fig. 5H          | <b>p53+/+ 4GY+ALS and p53-/- 4GY+ALS</b> | 0.000           |
